# Supplementary material for: Engineering Mitochondriotropic Carbon Dots for Targeting Cancer Cells
Source: Pharmaceuticals (Basel). 2021 Sep 16;14(9):932. doi: 10.3390/ph14090932 (PMC8470554; doi:10.3390/ph14090932)
Supplement: Supplementary file 1 [file pharmaceuticals-14-00932-s001.zip › pharmaceuticals-1377331-supplementary.pdf]

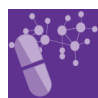

## Article

# Engineering Mitochondriotropic Carbon Dots for Targeting Cancer Cells

Archontia Kaminari <sup>1</sup>, Eleni Nikoli <sup>1</sup>, Alexandros Athanasopoulos <sup>2</sup>, Elias Sakellis <sup>1</sup>, Zili Sideratou <sup>1</sup> and Dimitris Tsiourvas <sup>1,\*</sup>

<sup>1</sup> National Centre for Scientific Research “Demokritos”, Institute of Nanoscience and Nanotechnology, 15310 Aghia Paraskevi, Greece; a.kaminari@inn.demokritos.gr (A.K.); h.nikoli@inn.demokritos.gr (E.N.); e.sakellis@inn.demokritos.gr (E.S.); z.sideratou@inn.demokritos.gr (Z.S.)

<sup>2</sup> National Centre for Scientific Research “Demokritos”, Institute of Biosciences and Applications, 15310 Aghia Paraskevi, Greece; alexandr@bio.demokritos.gr

\* Correspondence: d.tsiourvas@inn.demokritos.gr; Tel.: +30-210-650-3616

## Supplementary Material

**Table S1.** Quantum yields of CDs obtained employing a molar ratio of CA:EDA = 1:1 and microwave irradiated for different time periods (1.5 to 4.0 min).

| CA       |      | EDA    |      | NH <sub>2</sub> /COOH<br>Ratio | Time | QY   |
|----------|------|--------|------|--------------------------------|------|------|
| mass (g) | mmol | V (μL) | mmol |                                | min  | (%)  |
| 1.00     | 5.21 | 350    | 5.21 | 0.667                          | 1.5  | 39.4 |
| 1.00     | 5.21 | 350    | 5.21 | 0.667                          | 2.0  | 46.2 |
| 1.00     | 5.21 | 350    | 5.21 | 0.667                          | 3.0  | 40.3 |
| 1.00     | 5.21 | 350    | 5.21 | 0.667                          | 4.0  | 21.6 |

**Table S2.** Quantum yields of CDs obtained for various CA:EDA molar ratios after microwave irradiation for 2 min.

| CA       |      | EDA         |      | NH <sub>2</sub> /COOH<br>Ratio | CA:EDA<br>Molar Ratio | QY    |
|----------|------|-------------|------|--------------------------------|-----------------------|-------|
| mass (g) | mmol | Volume (μL) | mmol |                                |                       | (%)   |
| 1.00     | 5.21 | 280         | 4.20 | 0.54                           | 1.24                  | 37.97 |
| 1.00     | 5.21 | 315         | 4.72 | 0.60                           | 1.10                  | 37.35 |
| 1.00     | 5.21 | 350         | 5.21 | 0.67                           | 1.00                  | 39.13 |
| 1.00     | 5.21 | 385         | 5.77 | 0.74                           | 0.90                  | 48.54 |
| 1.00     | 5.21 | 420         | 6.29 | 0.81                           | 0.83                  | 40.56 |

**Table S3.** Alkyl-TPP functionalized carbon dots synthesized by the interaction of carbon dots (100 mg) with various moles of C<sub>4</sub>TPP or C<sub>10</sub>TPP, the number of their primary amino groups and the degree of functionalization for each sample.

| Sample                   | Alkyl-TPP (mmol) | Primary Amino Groups<br>(mmol NH <sub>2</sub> /g) | Degree of Functionalization (%) |
|--------------------------|------------------|---------------------------------------------------|---------------------------------|
| CD                       |                  | 1.18                                              | -                               |
| CD-C <sub>4</sub> TPP-1  | 10               | 0.81                                              | 31 %                            |
| CD-C <sub>4</sub> TPP-2  | 15               | 0.49                                              | 58 %                            |
| CD-C <sub>4</sub> TPP-3  | 25               | 0.21                                              | 82 %                            |
| CD-C <sub>10</sub> TPP-1 | 10               | 0.86                                              | 27 %                            |

---

|                          |    |      |      |
|--------------------------|----|------|------|
| CD-C <sub>10</sub> TPP-2 | 15 | 0.59 | 50 % |
| CD-C <sub>10</sub> TPP-3 | 25 | 0.20 | 83 % |

---

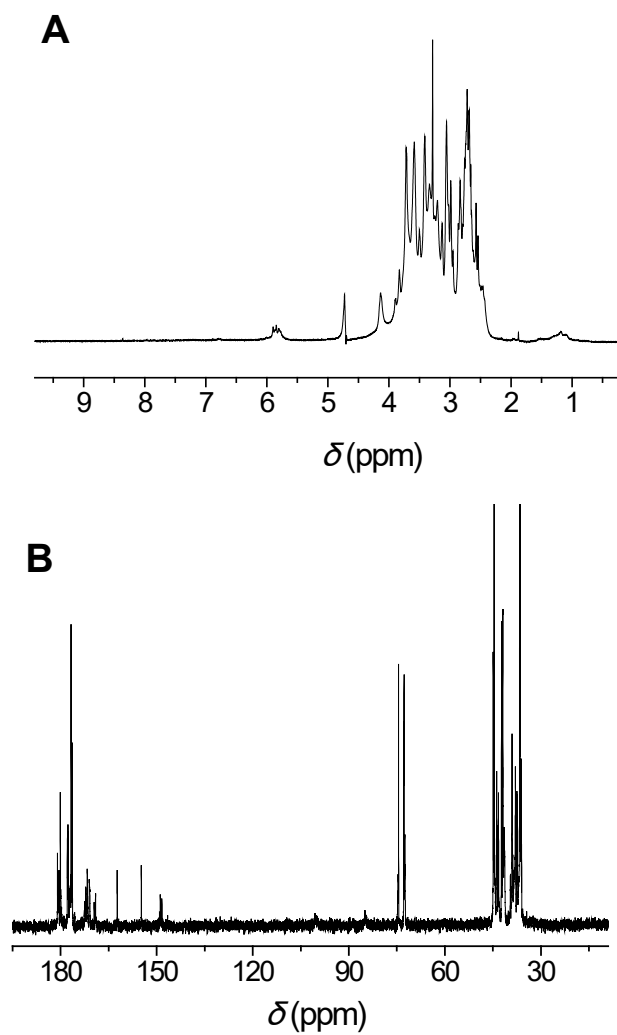

**Figure S1.** <sup>1</sup>H- NMR (A) and <sup>13</sup>C-NMR (B) spectra of N-doped CDs

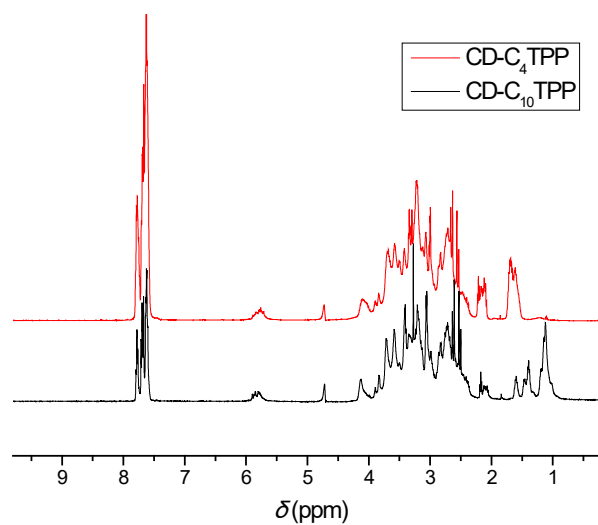

**Figure S2.**  $^1\text{H}$ - NMR spectra of alkyl-TPP functionalized CDs

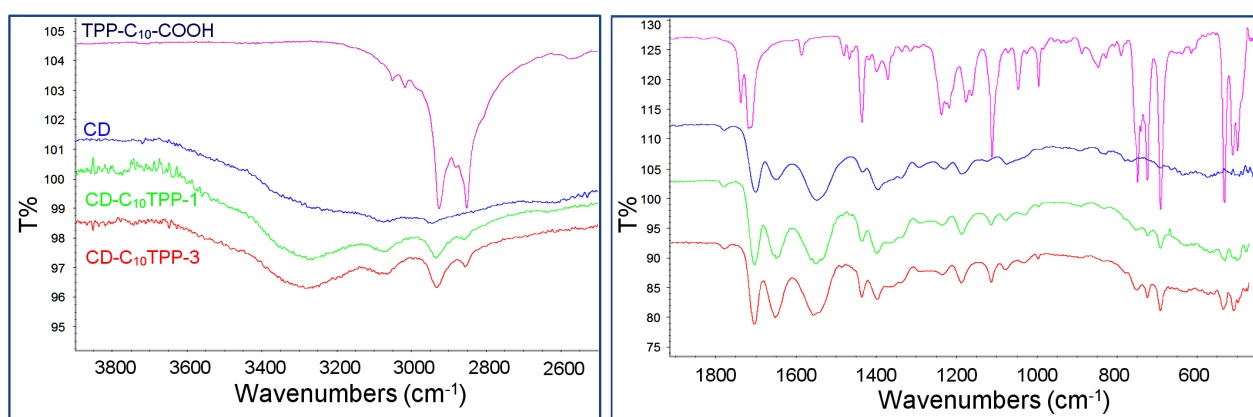

**Figure S3.** FTIR spectra of N-doped CDs, of (10-carboxydecyl)triphenylphosphonium bromide (TPP- $\text{C}_{10}$ -COOH), and of  $\text{C}_{10}$ TPP functionalized CDs with two different degrees of functionalization, i.e., 27 and 83 % for CD- $\text{C}_{10}$ TPP-1 and CD- $\text{C}_{10}$ TPP-3, respectively.

A

B

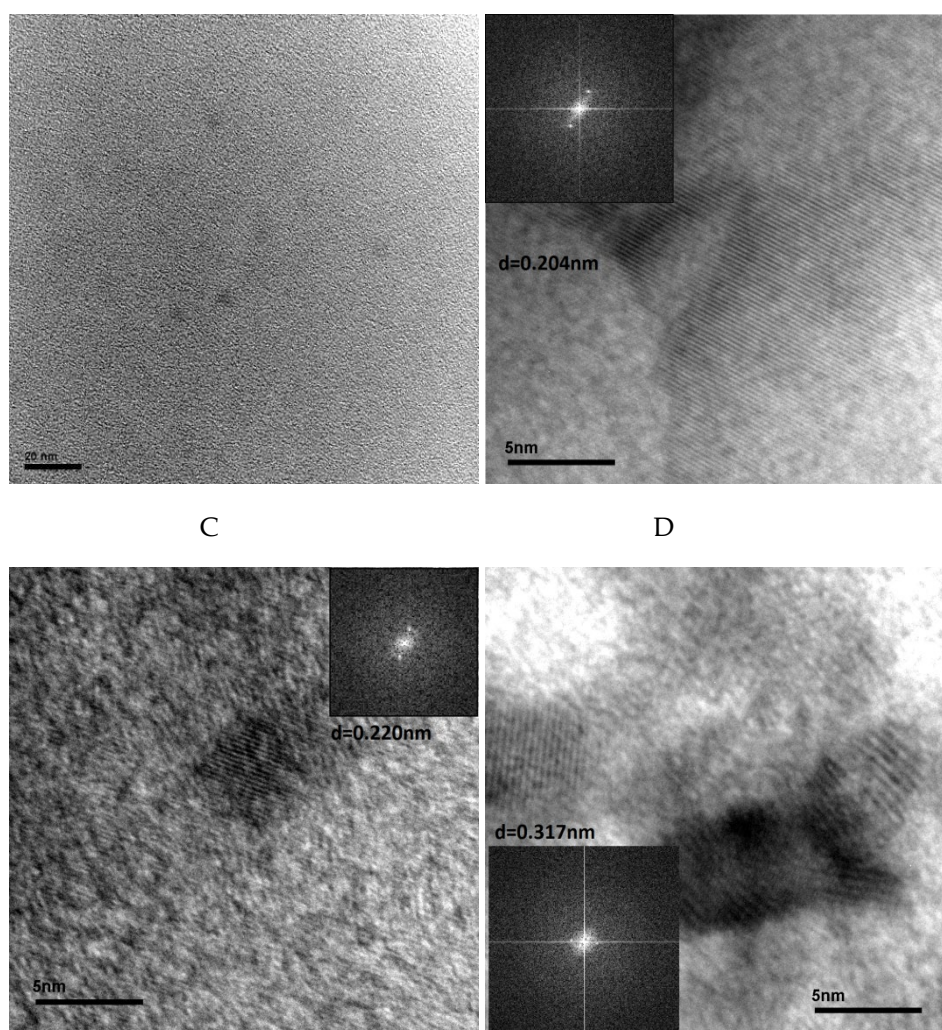

**Figure S4.** (A) TEM images of N-doped CDs. The size of the bar at the lower left corner is 20 nm. (B, C, D) High resolution TEM (HRTEM) images of N-doped CDs. The insets are the corresponding Fast Fourier transform (FFT) patterns.

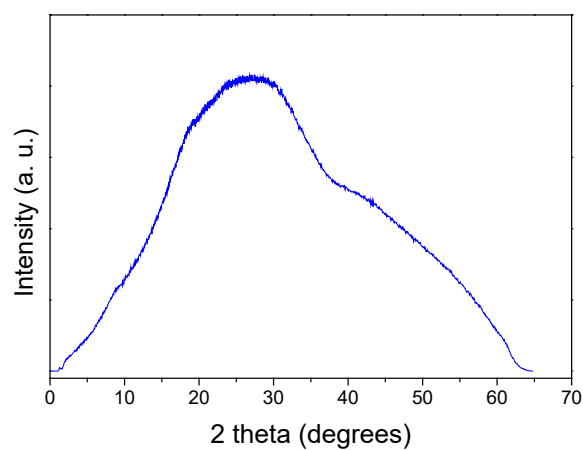

**Figure S5.** X-ray diffractogram of N-doped CDs.

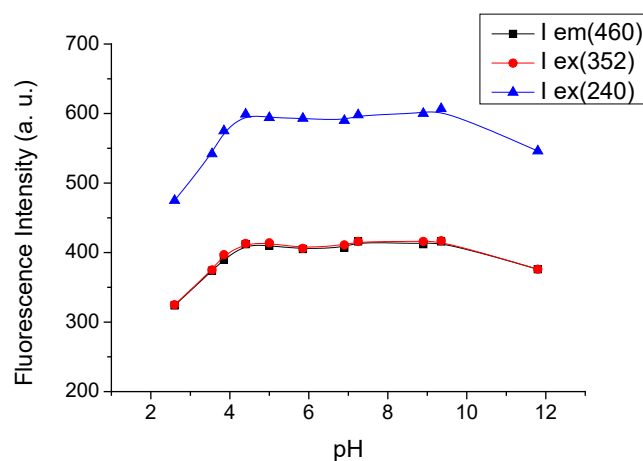

**Figure S6.** Fluorescence intensity of N-doped CDs in water vs. pH: Intensity of the emission spectra at 460 nm ( $\lambda_{ex}=352$  nm) and of the excitation spectra at 240 and 352 nm ( $\lambda_{em}=460$  nm).

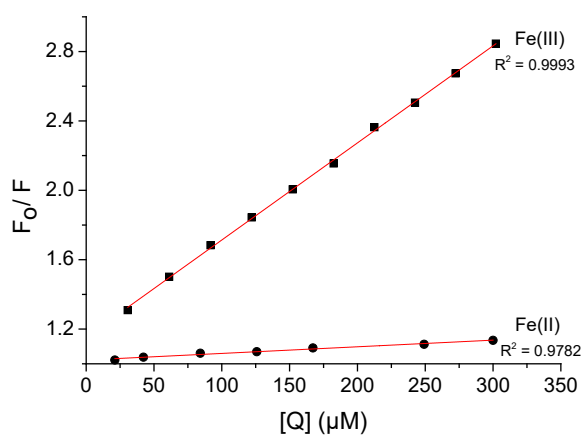

**Figure S7.** Quenching of the fluorescence of N-doped CDs by Fe(II) and Fe(III) ions in water.  $F_0$  and  $F$  are the fluorescence intensities in the absence and presence of quencher, respectively; while  $Q$  is the concentration of quencher.

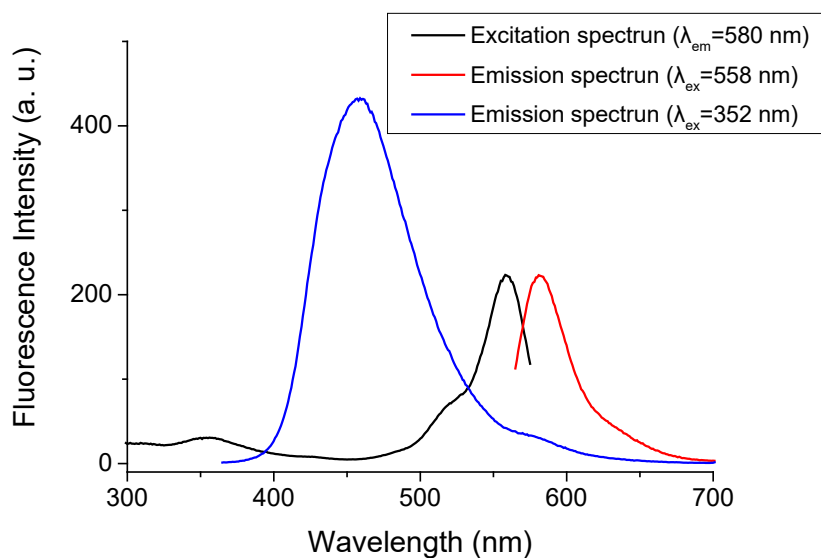

**Figure S8.** Fluorescence excitation and emission spectra of CD-C<sub>4</sub>TPP•Rh (0.1 mg/mL).

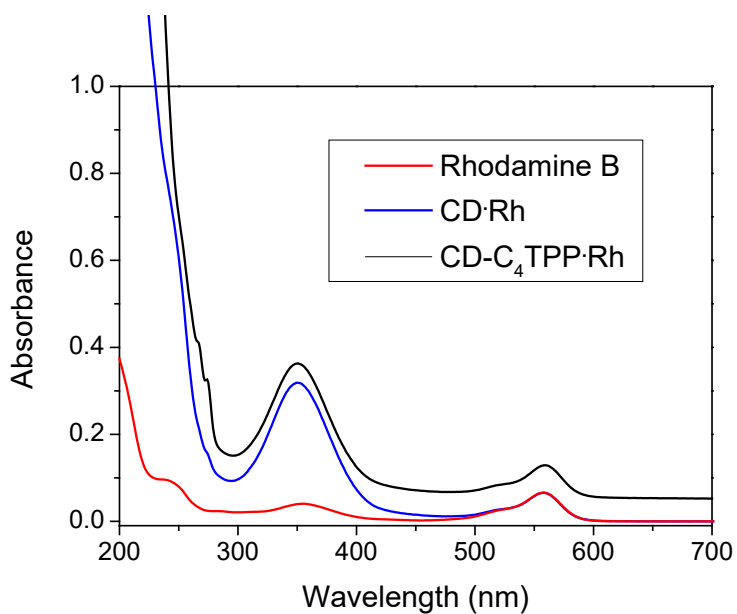

**Figure S9.** UV-Vis spectra of Rhodamine B, CD•Rh and its alkyl-TPP derivative CD-C<sub>4</sub>TPP•Rh (0.1 mg/mL). For clarity reasons, the CD-C<sub>4</sub>TPP•Rh curve is shifted by 0.05 units along the Y axis for clarity.

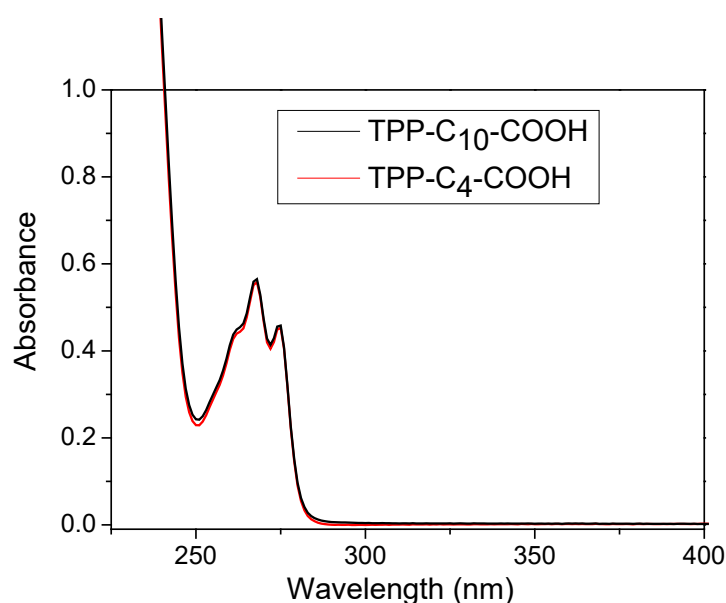

**Figure S10.** UV-Vis spectra of (4-carboxybutyl)triphenylphosphonium bromide (TPP-C<sub>4</sub>-COOH; 0.2 mM) and of (10-carboxydecyl)triphenylphosphonium bromide (TPP-C<sub>10</sub>-COOH; 0.2 mM) in ethanol.

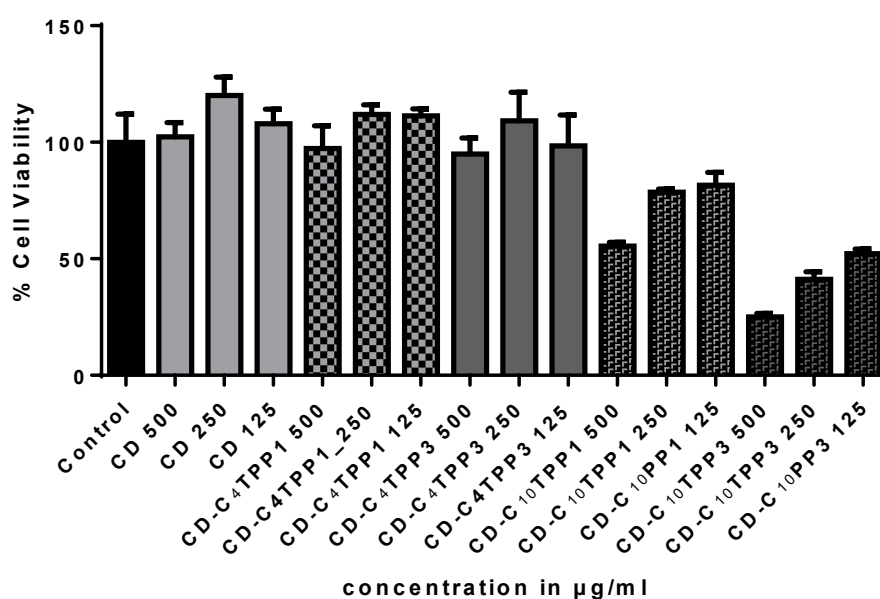

**Figure S11.** Cytotoxicity of alkyl-TPP functionalized carbon dots derivatives in MDA-MB-231 cell line. Cells were treated for 24 h with increasing concentrations (125–500 µg/mL) of CD-C<sub>4</sub>TPP1, CD-C<sub>4</sub>TPP3, and CD-C<sub>10</sub>TPP1, CD-C<sub>10</sub>TPP3 each of different degrees of functionalization (see Table S3). Cell viability was measured with MTT. Results are expressed as the mean ± standard error for at least three independent experiments.
